REVIEW PAPER

# Deconstructing Kranz anatomy to understand C<sub>4</sub> evolution

Marjorie R. Lundgren, Colin P. Osborne and Pascal-Antoine Christin\*

Department of Animal and Plant Sciences, University of Sheffield, Sheffield S10 2TN, UK

\* To whom correspondence should be addressed. E-mail: [p.christin@sheffield.ac.uk](mailto:p.christin@sheffield.ac.uk)

Received 13 January 2014; Revised 15 March 2014; Accepted 25 March 2014

## Abstract

C<sub>4</sub> photosynthesis is a complex physiological adaptation that confers greater productivity than the ancestral C<sub>3</sub> photosynthetic type in environments where photorespiration is high. It evolved in multiple lineages through the coordination of anatomical and biochemical components, which concentrate CO<sub>2</sub> at the active site of ribulose-1,5-bisphosphate carboxylase/oxygenase (Rubisco). In most C<sub>4</sub> plants, the CO<sub>2</sub>-concentrating mechanism is achieved via the confinement of Rubisco to bundle-sheath cells, into which CO<sub>2</sub> is biochemically pumped from surrounding mesophyll cells. The C<sub>4</sub> biochemical pathway relies on a specific suite of leaf functional properties, often referred to as Kranz anatomy. These include the existence of discrete compartments differentially connected to the atmosphere, a close contact between these compartments, and a relatively large compartment to host the Calvin cycle. In this review, we use a quantitative dataset for grasses (Poaceae) and examples from other groups to isolate the changes in anatomical characteristics that generate these functional properties, including changes in the size, number, and distribution of different cell types. These underlying anatomical characteristics vary among C<sub>4</sub> origins, as similar functions emerged via different modifications of anatomical characteristics. In addition, the quantitative characteristics of leaves all vary continuously across C<sub>3</sub> and C<sub>4</sub> taxa, resulting in C<sub>4</sub>-like values in some C<sub>3</sub> taxa. These observations suggest that the evolution of C<sub>4</sub>-suitable anatomy might require relatively few changes in plant lineages with anatomical predispositions. Furthermore, the distribution of anatomical traits across C<sub>3</sub> and C<sub>4</sub> taxa has important implications for the functional diversity observed among C<sub>4</sub> lineages and for the approaches used to identify genetic determinants of C<sub>4</sub> anatomy.

**Key words:** C<sub>4</sub> photosynthesis, complex trait, convergent evolution, co-option, Kranz anatomy, leaf.

## Introduction

During the diversification of flowering plants, C<sub>4</sub> photosynthesis evolved from C<sub>3</sub> ancestors more than 62 times independently in several distantly related groups (Sage *et al.*, 2011). C<sub>4</sub> photosynthesis is characterized by a biochemical CO<sub>2</sub> pump formed by the coordination of several evolutionary novelties, which increase the relative concentration of CO<sub>2</sub> around ribulose-1,5-bisphosphate carboxylase/oxygenase (Rubisco) to nearly eliminate photorespiration (Ludwig and Canvin, 1971; Hatch, 1987; von Caemmerer and Furbank, 2003; Skillman, 2008; Sage *et al.*, 2012). The CO<sub>2</sub>-concentrating mechanism relies on the primary fixation of atmospheric carbon by phosphoenolpyruvate carboxylase (PEPC) coupled with carbonic anhydrase. These reactions are spatially separated from the

secondary refixation of CO<sub>2</sub> by Rubisco (Hatch, 1987; von Caemmerer and Furbank, 2003). An efficient segregation of these C<sub>4</sub> biochemical reactions requires specific leaf functions (Hattersley, 1984; Dengler *et al.*, 1994; Muhaidat *et al.*, 2007).

As a result of its multiple origins, C<sub>4</sub> photosynthesis does not present a consistent and discrete phenotype, so is better considered a functional trait involving a suite of coordinated leaf anatomical and biochemical characteristics (Brown and Smith, 1972; Laetsch, 1974). These components can assemble differently during each origin of C<sub>4</sub> photosynthesis, and these divergent evolutionary histories result in high anatomical and biochemical diversity among, and sometimes within, C<sub>4</sub> lineages (Hattersley and Watson, 1992; Sinha and Kellogg,

1996; Kadereit *et al.*, 2003; Muhaidat *et al.*, 2007; Edwards and Voznesenskaya, 2011; Freitag and Kadereit, 2014). An understanding of the evolutionary transitions leading to the recurrent assembly of  $C_4$  photosynthesis requires investigation of the individual characteristics that together generate  $C_4$  function, not only in  $C_4$  species but also in  $C_3$  species variously related to  $C_4$  taxa (Christin and Osborne, 2013). It is particularly important to differentiate the present function of each component from its identity and developmental origin. In this work, we focus on the variation observed in both  $C_3$  and  $C_4$  plants in each of the anatomical traits that together generate leaf functions compatible with  $C_4$  photosynthesis. We combine a review of the literature with analyses of a quantitative leaf anatomy dataset compiled from 155  $C_3$  and  $C_4$  grass species (Christin *et al.*, 2013). The  $C_4$  grasses in this dataset encompass eight of the nine structural  $C_4$  forms described for this family (Edwards and Voznesenskaya, 2011).

## What is $C_4$ leaf anatomy?

Differential arrangements of cells and organelles within the leaves of taxa that we now recognize as  $C_3$  and  $C_4$  were first observed and published more than 80 years before the  $C_4$  pathway itself was discovered (Duval-Jouve, 1875; Haberlandt, 1884). The association between specific cell and organelle arrangements and the  $C_4$  pathway was then identified soon after the discovery of  $C_4$  photosynthesis (El-Sharkawy and Hesketh, 1965; Downton and Tregunna, 1968; Berry *et al.*, 1970; Welkie and Caldwell, 1970). Since then,  $C_4$  photosynthesis has usually been affiliated closely with a suite of leaf properties referred to as ‘Kranz’ anatomy (after Haberlandt’s description in German of a wreath-like arrangement of cells).

Kranz anatomy can be described as two distinct concentric layers of chlorenchyma cells, formed by a bundle sheath containing most of the chloroplasts, surrounded by an outer layer consisting of a small number of mesophyll cells. The visual identification of such arrangements in transverse section has been used in numerous anatomical surveys of leaves to identify the photosynthetic pathway for hundreds of species (Welkie and Caldwell, 1970; Carolin *et al.*, 1973, 1975, 1977; Brown, 1977; Hattersley *et al.*, 1982; Renvoize, 1987a).

Surveys of numerous  $C_3$  and  $C_4$  species over the past five decades have shown that leaf anatomies cannot be easily and consistently grouped into discrete categories corresponding to the two photosynthetic types but come in many flavours (Brown, 1975; Edwards and Voznesenskaya, 2011). It is true that the leaf anatomy of a randomly selected  $C_3$  plant is highly likely to deviate significantly from that of a randomly selected  $C_4$  plant. For example, *Viburnum punctatum*, like most  $C_3$  eudicots, has distinct horizontal layers of mesophyll cells in its leaves (Fig. 1A), arranged such that it does not conform to the general anatomical pattern generally present in  $C_4$  plants, whereby the bundle-sheath and mesophyll cells form concentric circles around the vasculature (Fig. 1C). This concentric arrangement of cells can be found in many  $C_3$  grasses though (Figs 1B and 2) (Hattersley *et al.*, 1982; Dengler *et al.*, 1994; Besnard *et al.*, 2013) and, as detailed below, individual leaf characteristics that are usually associated with a  $C_4$  function can be found in at least some  $C_3$  plants. Furthermore, some plants achieve  $C_4$  photosynthesis without the segregation of photosynthetic reactions into different types of cells (Boves and Salvucci, 1984; Boves and Salvucci, 1989; Freitag and Stichler, 2000; Edwards *et al.*, 2004). Despite this variation,  $C_4$  physiology is still associated with a suite

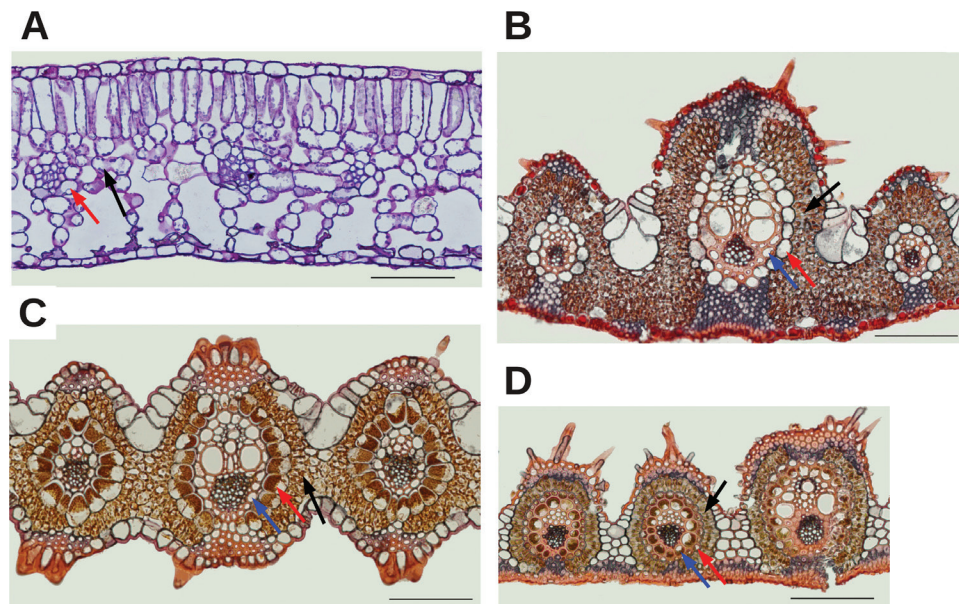

**Fig. 1.** Examples of  $C_3$  and  $C_4$  leaf cross-sections. The  $C_3/C_4$  pair on the left (A, C) are unrelated, belonging to different major groups of flowering plants. By contrast, the  $C_3/C_4$  pair on the right (B, D) is composed of closely related species, belonging to the same subfamily of grasses. (A) *Viburnum punctatum* ( $C_3$ , Adoxaceae), (B) *Sartidia angolensis* ( $C_3$ , Poaceae), (C) *Centropodia mossamedensis* ( $C_4$ , Poaceae), and (D) *Aristida mollissima* ( $C_4$ , Poaceae). Black arrows indicate the mesophyll, red arrows the outer bundle sheath, and blue arrows the inner sheath of grasses (=mesostome sheath). The four cross-sections are shown at the same scale. Bars, 100  $\mu\text{m}$ . Picture (A) was kindly provided by Dr David Chatelet from Brown University and pictures (B), (C) and (D) come from the collections of Professor J. Travis Columbus from Rancho Santa Ana Botanic Garden, CA, USA, with permission.

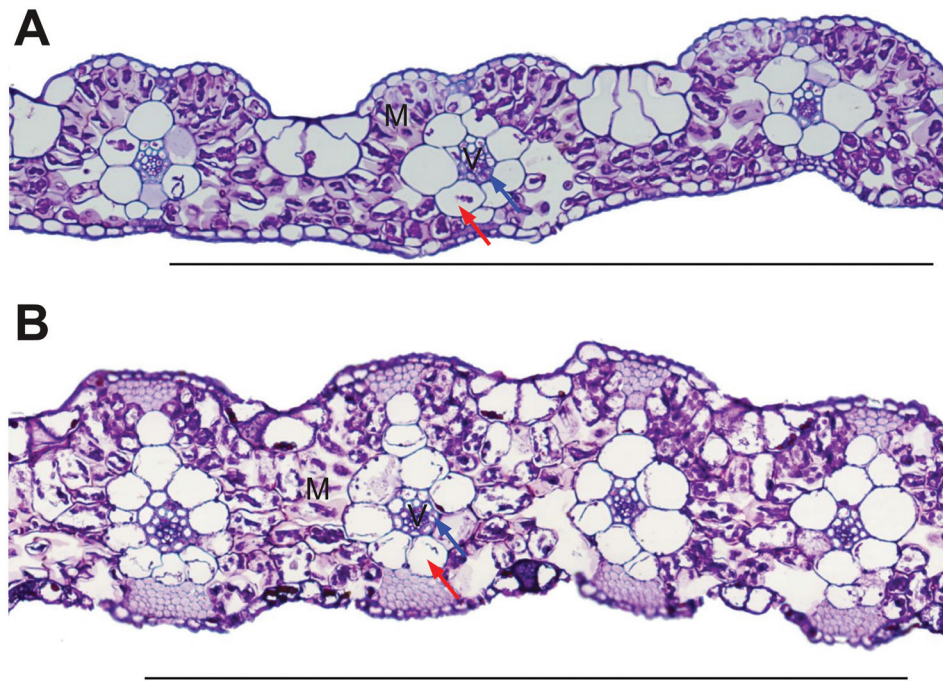

**Fig. 2.** Examples of  $C_3$  grasses with leaf anatomy close to the  $C_4$  requirements. (A) *Panicum pygmaeum* ( $C_3$ ), (B) *Panicum malacotrichum* ( $C_3$ ). The mesophyll (M) and vascular tissue (V) are indicated on the sections. Red arrows indicate the outer bundle sheath while blue arrows indicate the inner sheath (=mestome sheath). Bars, 500  $\mu\text{m}$ .

of functional properties (Brown and Smith, 1972; Edwards and Voznesenskaya, 2011), which must first be considered before analysing diversity in the identity and developmental origins of the characteristics that generate them. Based on the literature, the following functional properties of leaves are considered essential requirements for  $C_4$  photosynthesis (Hattersley *et al.*, 1977; Leegood, 2002; von Caemmerer and Furbank, 2003; Edwards and Voznesenskaya, 2011; Nelson, 2011). Note that these apply equally to all  $C_4$  plants, whether or not they use distinct types of cells.

1. There must be two distinct compartments arranged so that atmospheric gases reach the first compartment more easily than the second. The first compartment houses the PEPC reactions, while the second, with characteristics that restrict  $\text{CO}_2$  efflux, houses the Calvin cycle.
2. The two compartments must be in close contact to allow the rapid exchange of metabolites.
3. The compartment where the Calvin cycle occurs must occupy a large enough fraction of the leaf to accommodate a significant number of chloroplasts.
4. Chloroplasts must be abundant in the Calvin cycle compartment.

These functional properties are extremely important for  $C_4$  physiology and biochemistry. However, to understand the gradual evolutionary changes leading to the recurrent assembly of  $C_4$  photosynthesis, it is important to account for exact changes in cellular characteristics and the genetic determinants of these characteristics. In the following sections, we therefore discuss how each of the four functional properties listed above is generated from underlying characteristics. We

look at how these characteristics vary qualitatively and quantitatively among  $C_3$  and  $C_4$  lineages, and show how there is an overlap between the values observed in  $C_3$  and  $C_4$  species.

#### *Two compartments differentially connected to the atmosphere*

In  $C_3$  plants, the Calvin cycle occurs in most of the leaf, while it is restricted to specific locations in  $C_4$  plants. It is well known that the identity of the compartments co-opted for the segregation of the atmospheric  $\text{CO}_2$  fixation by PEPC and its refixation by the Calvin cycle differs among  $C_4$  origins (e.g. Brown, 1975; Dengler *et al.*, 1985). For instance, some single-celled  $C_4$  species have evolved separate compartments for the PEPC and Calvin cycle reactions through the rearrangements of organelles or vacuoles within individual photosynthetic cells (Edwards *et al.*, 2004). In the majority of  $C_4$  plants, however, the PEPC and Calvin cycle reactions are segregated in different types of cells. In  $C_3$  species, the mesophyll and bundle sheath represent two physiologically distinct types of cells, and the central position of bundle-sheath cells within the leaf gives the opportunity for minimal contact with the atmosphere (Figs 1A, B and 3, and Supplementary Fig. S1 available at *JXB* online). The bundle sheaths have consequently been co-opted for Calvin cycle reactions across most  $C_4$  origins, while the mesophyll cells, which are better connected to the atmosphere, are used for the PEPC reactions. Despite this convergence in function, the bundle-sheath cells recruited for  $C_4$  photosynthesis are not homologous among all  $C_4$  origins.

In some  $C_4$  species within the grass genera *Arundinella*, *Garnotia*, *Arthropogon*, *Achlaena*, *Dissochondrus*, *Anrthraxon*,



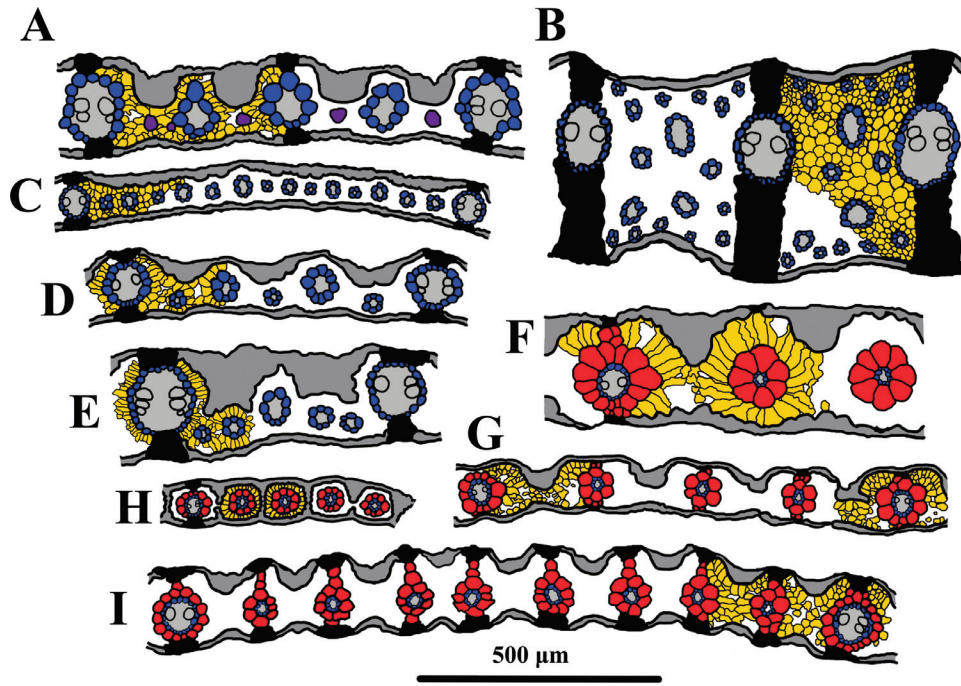

**Fig. 3.** Leaf anatomy for selected cross-sections of grasses. (A) *Arundinella nepalensis* ( $C_4$ ), (B) *Anthaenantia lanata* ( $C_4$ ), (C) *Axonopus compressus* ( $C_4$ ), (D) *Ischaemum afrum* ( $C_4$ ), (E) *Chrysopogon pallidus* ( $C_4$ ), (F) *Alloteropsis cimicina* ( $C_4$ ), (G) *Panicum pygmaeum* ( $C_3$ ), (H) *Bouteloua stolonifera* ( $C_4$ ) and (I) *Panicum malacotrichum* ( $C_3$ ). The diagrams highlight the mesophyll cells (yellow), outer bundle sheaths (red), inner bundle sheaths (blue), and distinctive cells (purple). Uncoloured central areas are composed of mesophyll cells and intercellular airspace. Vein (light grey), epidermis (dark grey), and sclerenchymatous girders (solid black) are also shown. Where only one bundle sheath is present, it is assumed that the outer bundle sheath has been lost and the inner bundle sheath remains. All cross-sections are drawn at the same scale, indicated at the bottom. The corresponding pictures can be found in [Supplementary Fig. S1](#) available at JXB online.

and *Microstegium*, the Calvin cycle also occurs in distinctive cells, which are atypical bundle-sheath-like cells, differentiated within the mesophyll but not associated with vascular bundles (Fig. 3A) (Tateoka, 1958; Hattersley and Watson, 1992; Ueno, 1995; Dengler et al., 1996; Wakayama et al., 2003). In addition, grasses and sedges possess multiple layers of sheath cells, with inner layers derived from procambium (often referred to as the ‘mestome sheath’) and outer layers from ground meristem (Dengler et al., 1985; Soros and Dengler, 2001; Martins and Scatena, 2011). In studies of  $C_4$  photosynthesis, consideration of the different cells is often based on their function. However, for evolutionary studies, the ontogenic origin of each type of cell needs to be established independently of its function. The  $C_4$  lineages within grasses and sedges have alternatively co-opted one or both of these cell types, while the second cell layer is often lost, for example in the numerous  $C_4$  grasses with a single sheath layer (Fig. 3A–E) (Brown, 1975; Dengler et al., 1996; Soros and Dengler, 2001; Martins and Scatena, 2011). This diversity in the identity of the two compartments co-opted for the segregation of  $C_4$  reactions, together with phylogenetic analyses, has been used previously to argue for multiple independent  $C_4$  origins, rather than fewer origins followed by reversals in closely related  $C_3$  species (Kellogg, 1999; Christin et al., 2010).

The limited connection of the Calvin cycle compartment to the atmosphere is also achieved via different mechanisms in the different  $C_4$  lineages. First, tightly packing mesophyll cells around the bundle sheath reduces the fraction of cells from

the latter that are in contact with the atmosphere (Dengler et al., 1994; Muhaidat et al., 2007), although similar packing also occurs in some  $C_3$  grasses (Fig. 1B) (Dengler et al., 1994) and some  $C_3$  eudicots (Muhaidat et al., 2007). In addition, the bundle-sheath cell walls can also be covered with a layer of suberin, which limits gas diffusion. This is the case in  $C_4$  monocots that have co-opted the inner sheath layer for a  $C_4$  function (Hattersley and Browning, 1981; Ueno et al., 1988b). However, the presence of suberin layers on the inner sheath cell walls can also be found in most  $C_3$  grasses (Hattersley and Browning, 1981). Neither of the characteristics reducing contact of the Calvin cycle with the atmosphere is therefore found exclusively in  $C_4$  plants.

#### *Distance between the two compartments*

Close contact between the PEPC and Calvin cycle compartments is guaranteed in plants with a single-celled  $C_4$  system. In plants with a dual-celled  $C_4$  system, the presence of mesophyll cells not directly adjacent to the bundle sheaths will increase the average distance between the compartments containing PEPC and Rubisco. This problem is usually solved in  $C_4$  plants by limiting the number of cells separating consecutive Calvin cycle compartments, and by organizing mesophyll cells into one or two layers around the bundle sheath (Fig. 1C, D), which produces the classical pattern of Kranz anatomy. In some species, this configuration is achieved through the development of a

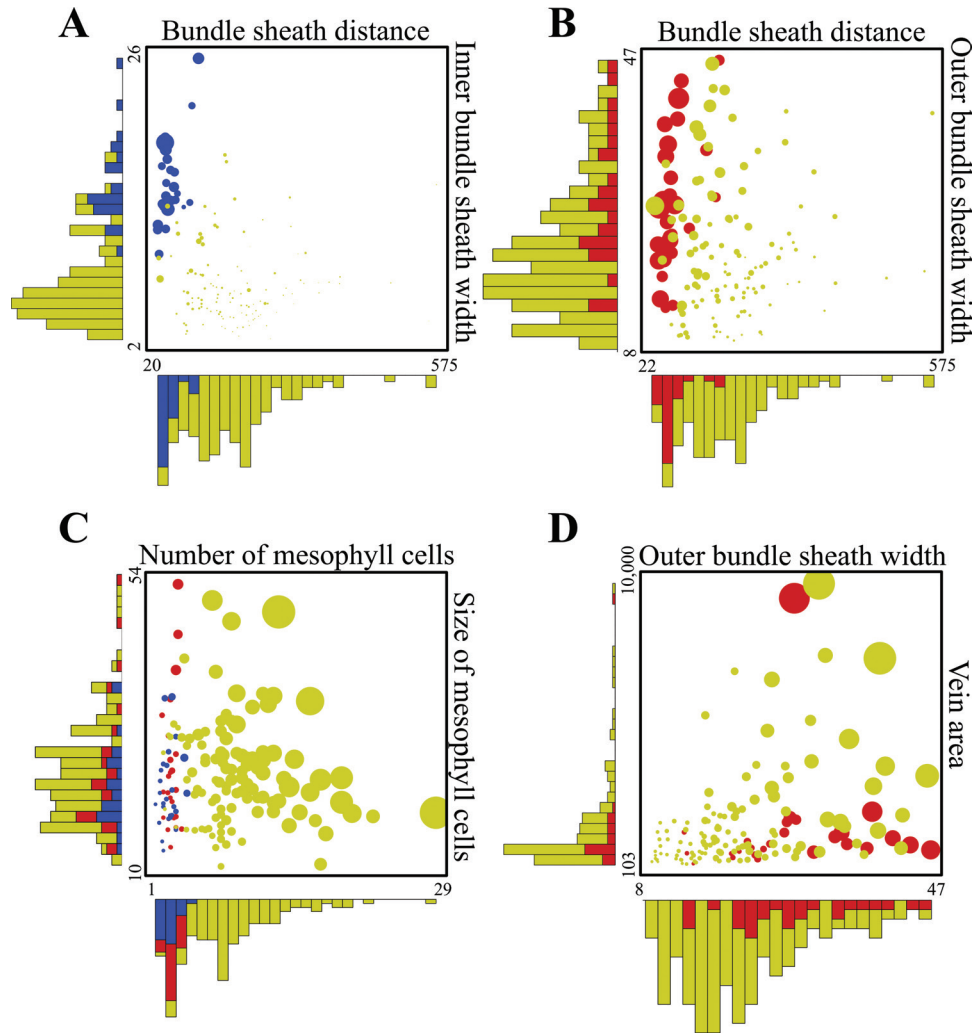

**Fig. 4.** Multidimensionality of  $C_4$  anatomy in grasses. Scatter plots for anatomical variables associated with the  $C_4$  syndrome are shown, along with frequency distributions for each trait, arranged along the axes. For each pair of variables, dot size is proportional to a third variable.  $C_3$  grass species are shown in yellow,  $C_4$  grass species using the outer sheath for the Calvin cycle in red, and  $C_4$  grass species using the inner sheath for the Calvin cycle in blue. Relationships are shown between means of: (A) distance between consecutive bundle sheaths ( $\mu\text{m}$ ) and inner bundle-sheath cell width ( $\mu\text{m}$ ), with dot size proportional to the percentage of inner bundle-sheath area; (B) distance between consecutive bundle sheaths ( $\mu\text{m}$ ) and outer bundle-sheath cell width ( $\mu\text{m}$ ), with dot size proportional to the percentage of outer bundle-sheath area; (C) number of mesophyll cells between consecutive bundles and mesophyll cell length ( $\mu\text{m}$ ), with dot size proportional to the distance between consecutive bundle sheaths ( $\mu\text{m}$ ); and (D) outer bundle sheath cell width ( $\mu\text{m}$ ) and area of vasculature ( $\mu\text{m}^2$ ), with dot size proportional to the outer bundle sheath area ( $\mu\text{m}^2$ ) per vein number. The data for 170 grasses (representing 155 species) come from [Christin \*et al.\* \(2013\)](#).

single bundle-sheath layer that encompasses all the vasculature within the leaf and often water-storage cells as well, and a single layer of mesophyll that surrounds the bundle sheath. Variations on this anatomical theme are common among  $C_4$  eudicots and have been found in the Asteraceae, Amaranthaceae, and Cleomaceae families ([Carolín \*et al.\*, 1975](#); [Das and Raghavendra, 1976](#); [Kadereit \*et al.\*, 2003](#); [Peter and Katinas, 2003](#); [Edwards and Voznesenskaya, 2011](#); [Koteyeva \*et al.\*, 2011](#)). Some  $C_4$  grasses have similar bundle sheaths that extend horizontally from the vascular tissue and join together, such that the mesophyll becomes isolated in small patches ([Renvoize, 1983](#)).

For  $C_4$  lineages with multiple photosynthetic units formed by concentric cell layers of mesophyll, bundle sheath, and vascular tissue, the presence of fewer mesophyll cells between consecutive veins can be achieved via two different

developmental mechanisms. First, the number of cells that develop between consecutive bundle sheaths can be directly reduced during ontogeny. Second, extra Calvin cycle compartments, such as distinctive cells or minor veins, can be added to decrease the average distance between compartments, as has been documented in both monocots (e.g. Poaceae; [Fig. 3A–E](#); [Renvoize, 1987a](#); [Dengler \*et al.\*, 1994](#); [Ueno \*et al.\*, 2006](#); [Christin \*et al.\*, 2013](#)) and eudicots (e.g. Asteraceae; [McKown and Dengler, 2007](#); [McKown and Dengler, 2009](#); Cleomaceae; [Marshall \*et al.\*, 2007](#)).

Interveinal distance (or vein density) is often considered a proxy for the number of mesophyll cells between consecutive bundles, and largely overlaps between  $C_3$  and  $C_4$  grasses ([Christin \*et al.\*, 2013](#)) and eudicots ([Muhaidat \*et al.\*, 2007](#)). However, the relationship between interveinal distance and the number of mesophyll cells is only partial. First, because

interveinal distance is influenced both by the diameter of the veins and the size of the bundle sheaths, measuring the actual distance between bundle sheaths is more relevant. This distance is influenced by the size of individual mesophyll cells, their orientation, and finally their number (Fig. 4C). Some  $C_4$  species, such as *Alloteropsis cimicina*, have relatively large interveinal distances but with only a few large mesophyll cells between consecutive bundles (Fig. 3F, 4C). In addition, the number of mesophyll cells containing PEPC below and above veins can influence the average distance between the PEPC and Calvin cycle reactions independently of the distance between consecutive bundles. Some thick  $C_4$  leaves, such as those of *Anthaenathia lanata* (Fig. 3B) or some *Portulaca* (Ocampo *et al.*, 2013), consequently require a three-dimensional venation system. Finally, leaf thickness is often reduced between veins so that there are few mesophyll cells in positions most distant from the bundle sheaths, and interveinal distance can greatly exceed the average distance between photosynthetically active mesophyll cells and bundle-sheath cells (Figs 1 and 3). For instance, in leaves of the  $C_3$  grass *Panicum pygmaeum*, the average number of mesophyll cells between bundles greatly exceeds four. However, because its leaf thickness decreases between veins, the number of mesophyll cells separated from the bundle sheath by more than one cell is smaller than the number of mesophyll cells separated from the bundle sheath by zero or one cell (38 versus 73 cells between the three veins in Fig. 2). Finally, the distance between consecutive bundles can be increased by the presence of achlorophyllous cells that do not influence the average path length from PEPC to Calvin cycle cells (e.g. Fig. 1D).

The number of mesophyll cells between consecutive bundles will distinguish  $C_3$  from  $C_4$  taxa with a high success rate and has consequently been proposed as a criterion to recognize  $C_4$  plants (Hattersley and Watson, 1975; Renvoize, 1987a; Sinha and Kellogg, 1996). However, the  $C_3$  and  $C_4$  distributions for this trait also overlap (Fig. 4C). For instance, *Panicum malacotrichum* is a  $C_3$  grass with less than four mesophyll cells between veins (Fig. 2). The variation observed in both  $C_3$  and  $C_4$  taxa is probably due to the importance of vascular architecture for both photosynthetic types. While the distance between consecutive bundles affects the efficiency of  $C_4$  photosynthesis (Ogle, 2003), vein density also influences the transport of metabolites, leaf hydraulics and other physiological characteristics in  $C_3$  plants (Sack and Scoffoni, 2013; Sack *et al.*, 2013). In summary, both interveinal distance and the number of mesophyll cells between consecutive bundles overlap in  $C_3$  and  $C_4$  taxa, so that  $C_4$  values represent only a subset of those observed among all photosynthetic types (Fig. 4A–C) (Muhaidat *et al.*, 2007; Christin *et al.*, 2013).

The transport of metabolites between the PEPC and Calvin cycle compartments in  $C_4$  plants is also facilitated by a number of plasmodesmata connecting mesophyll and bundle-sheath cells that exceeds the number found in  $C_3$  plants (Olesen, 1975; Weiner *et al.*, 1988; Botha, 1992). However, plasmodesmata frequency is known in only a few  $C_3$  species, so the overall variation in this trait cannot be established with confidence.

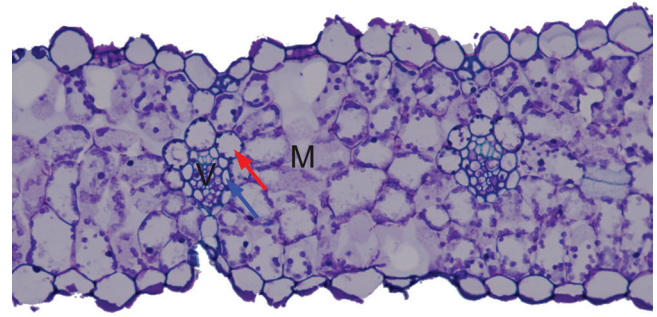

**Fig. 5.** Detail of a cross-section for *Dactylis glomerata*. The mesophyll (M) and vascular tissue (V) are indicated on the section of this  $C_3$  species. The red arrow indicates the outer bundle sheath, while the blue arrow indicates the inner sheath (=mestome sheath). Bar, 100  $\mu$ m. Note the incomplete outer sheath.

### Large Calvin cycle compartment

The amount of  $CO_2$  that can be re-fixed by Rubisco in the Calvin cycle will depend on the number of chloroplasts within the compartment co-opted for this function. The size of this compartment, not including the volume occupied by the vacuole, will influence the number of chloroplasts that can be accommodated. Thus,  $C_4$  plants tend to have enlarged bundle-sheath cells able to accommodate numerous chloroplasts. More than the size of individual bundle sheath cells, the cumulative volume of bundle sheath relative to the PEPC compartment (mesophyll) is relevant, and seems to be constrained within a given range in  $C_4$  plants (Hattersley, 1984; Dengler *et al.*, 1994; Muhaidat *et al.*, 2007). This might represent a trade-off between having sufficient chloroplasts in the Calvin cycle compartment and still conserving enough mesophyll volume for PEPC.

Similar bundle sheath:mesophyll ratios can be achieved through different combinations of the numerator (volume of bundle sheath) and denominator (volume of mesophyll). For instance, similar proportions of bundle sheath can be achieved through alternative developmental mechanisms, involving the production of either larger or more numerous bundle-sheath cells (the latter is generally achieved through a proliferation of veins; Fig. 3) (Hattersley, 1984; McKown and Dengler, 2009). The cross-sectional area of mesophyll per vein is mainly a function of the distance between veins, the thickness of the leaf (including the thickness between veins in comparison to that at the veins) and the presence of achlorophyllous cells (Christin *et al.*, 2013). On the other hand, when viewed in transverse section, the total area of a given type of bundle sheath per vein is a function of the size of the bundle-sheath cells, the diameter of the veins, and, in some cases, the completeness of the bundle sheath (Fig. 4) (Christin *et al.*, 2013). For instance, the external bundle sheath of many grasses is not developed on the abaxial side of the leaf, which reduces the total volume of this tissue (Fig. 5) (e.g. Renvoize, 1985, 1987b). Thus, the relative amount of bundle-sheath tissue is a function of at least five distinct traits, which may all vary independently. Functionally similar characteristics can consequently arise through different developmental modifications, as highlighted by the diversity of  $C_4$  leaf anatomy (Fig. 4).



The five components that dictate the relative amount of bundle-sheath tissue are important determinants of the gross leaf anatomy associated with  $C_4$  photosynthesis. However, each component shows an essentially continuous distribution across  $C_3$  and  $C_4$  values, such that  $C_4$ -compatible ranges merely represent a subset of the distribution found in  $C_3$  taxa (Fig. 4; Marshall *et al.*, 2007; McKown and Dengler, 2007). The  $C_4$ -suitability of one parameter depends on the values of the other parameters. For instance, large volumes of bundle-sheath tissue can arise in the presence of significant distances between consecutive bundles if the bundle-sheath cells are enlarged (Fig. 4A, B). This is highlighted by a comparison of *Alloteropsis cimicina* and *Axonopus compressus* (Fig. 3F and C, respectively), which achieved similar ratios of bundle sheath per mesophyll area [BS/(BS+M) of 0.26 and 0.21, respectively] through different means. *Alloteropsis cimicina* has very large outer bundle sheaths that are separated by long distances of mesophyll, while *Axonopus compressus* has small inner sheaths that are separated by very short mesophyll distances in particularly thin leaves (Fig. 3F and 3C, respectively).

During the course of evolution, numerous alterations in the characteristics that generate each leaf function occur either stochastically or in response to selective pressures. For instance, leaf thickness often represents an adaptation to the amount of light received by plants (Boardman, 1977; Terashima *et al.*, 2001). The number and size of veins alters the hydraulics of a plant, which, in turn, affects the sorting of plants across environments (McKown *et al.*, 2010; Sack *et al.*, 2012). Finally, the bundle sheath controls water flux between the mesophyll and vascular tissue such that an increase in bundle-sheath size might provide better protection against cavitation in arid environments (Sage, 2001; Leegood, 2008; Griffiths *et al.*, 2013). Recurrent and independent changes in different leaf properties repeatedly led to the emergence of tissues suitable for  $C_4$  photosynthesis, which characterize numerous extant  $C_3$  plants (Muhaidat *et al.*, 2007; Edwards and Voznesenskaya, 2011; Muhaidat *et al.*, 2011; Kadereit *et al.*, 2012; Christin *et al.*, 2013; Griffiths *et al.*, 2013).

#### Distribution of organelles

One of the most important requirements for  $C_4$  photosynthesis probably lies in the distribution of chloroplasts. Although they are present in all photosynthetic cells of  $C_3$  plants, chloroplasts are especially abundant in mesophyll cells and can vary from equally abundant to completely absent in bundle-sheath cells (Figs 1, 2 and 5) (Crookston and Moss, 1970). In  $C_4$  plants, the light-dependent and light-independent functions of chloroplasts are often decoupled, and chloroplasts of the PEPC and Calvin cycle compartments can become morphologically and functionally differentiated (Woo *et al.*, 1970; Laetsch, 1974; Hattersley *et al.*, 1977; Bowman *et al.*, 2013). Although the characteristics and distribution of organelles vary among  $C_4$  lineages (Ueno *et al.*, 1988b; Voznesenskaya *et al.*, 2006; Edwards and Voznesenskaya, 2011), the Calvin cycle compartment of  $C_4$  plants consistently has a high concentration of chloroplasts, where the enzymes of the Calvin cycle are preferentially expressed.

No quantitative census of chloroplast distribution is available for randomly selected plants; however, the organelle distribution has been investigated in species closely related to  $C_4$  lineages, which shows that some plants maintain significant numbers of chloroplasts in bundle-sheath cells, despite lacking a functional  $C_4$  pathway (Hattersley *et al.*, 1982; Ueno and Sentoku, 2006; Christin *et al.*, 2013). This is particularly common in plants using  $C_2$  photosynthesis, a weak  $CO_2$ -concentrating mechanism based on a glycine shuttle from mesophyll to bundle-sheath cells (Edwards and Ku, 1987; Sage *et al.*, 2012). When chloroplast abundance in bundle-sheath cells is compared among taxa, there is a gradient from closely related  $C_3$  to  $C_2$ , and then from  $C_2$  to  $C_4$  species (Muhaidat *et al.*, 2011; Sage *et al.*, 2013). The  $C_2$  trait is consequently often considered an evolutionary intermediate between  $C_3$  and  $C_4$  types (Hylton *et al.*, 1988; Sage *et al.*, 2012; Williams *et al.*, 2013). Therefore, as for other anatomical traits, the number of chloroplasts in bundle-sheath cells varies and may form a continuum between  $C_3$  and  $C_4$  species. Despite this, a high concentration of chloroplasts in bundle-sheath cells might be the only trait that occurs systematically within dual-celled  $C_4$  photosynthesis that is never present in non- $C_4$  plants. The tight association between  $C_4$  physiology and chloroplast distribution is explained by the fact that  $C_4$  physiology results from a differential distribution of the Calvin cycle (among other biochemical reactions), which is usually linked to the distribution of chloroplasts.

Other ultrastructural properties associated with some  $C_4$  plants include the distribution of mitochondria and peroxisomes among compartments, the distribution of organelles within compartments and the ultrastructure and photochemical properties of the chloroplasts (Bruhl and Perry, 1995; Edwards and Voznesenskaya, 2011). Some of these properties are also observed in non- $C_4$  species closely related to  $C_2$  and  $C_4$  taxa (Sage *et al.*, 2012).

#### Plasticity for $C_4$ -suitable anatomy

Phenotypic plasticity to environmental cues creates an additional layer of variation and further blurs the dichotomy between  $C_4$  and non- $C_4$  anatomy. Specifically, plasticity for the anatomical traits relevant to photosynthesis (e.g. compartmentalization, interveinal distance, mesophyll cell size and number, bundle-sheath cell size, and organelle distribution) could partially explain the variation found in these anatomical characteristics or, more importantly, the shift of  $C_3$  plants into the  $C_4$ -suitable space. Plasticity for these traits has been documented in the literature. For example, the  $C_3$  grass *Phragmites australis* acquires  $C_4$ -like traits when it grows at low soil water potentials (Gong *et al.*, 2011). Specifically, interveinal distance decreases, chlorophyll content within bundle-sheath cells increases, and the activity of  $C_4$ -related enzymes increases as soil water potential becomes more negative across a natural precipitation gradient (Gong *et al.*, 2011). The  $C_4$ -like *Flaveria brownii* lacks the complete suite of anatomical characteristics required for a fully functioning  $C_4$  system (Araus *et al.*, 1990). However, this species can plastically increase its degree of  $C_4$  photosynthesis by nearly doubling its investment in

bundle-sheath tissue relative to mesophyll in response to high irradiance compared with when it is grown at low irradiance (1200 vs 80  $\mu\text{mol m}^{-2} \text{s}^{-1}$  photosynthetic photon flux density, respectively; [Araus \*et al.\*, 1991](#)). Furthermore, interveinal distances decreased in the  $C_3$  grasses, *Festuca arundinaceae* (43% decrease), and the  $C_3/C_4$  intermediate grass *Panicum milioides* (34% decrease), when grown in high versus low nitrogen levels ([Bolton and Brown, 1980](#)).

In addition to the plasticity of individual anatomical components, two different modes of environmentally induced  $C_4$  photosynthesis exist. First, several aquatic species of Hydrocharitaceae, and possibly some Alismataceae and Cyperaceae, are able to switch from  $C_3$  to single-cell  $C_4$  photosynthesis ([Bowes \*et al.\*, 2002](#)). The environmental cue for this plasticity may be exposure to low- $\text{CO}_2$  conditions as they become submerged under water, or seasonal variation in temperature ([Bowes \*et al.\*, 1979](#); [Bowes, 2011](#)). In contrast, some aquatic *Eleocharis* species use  $C_3$  or  $C_3/C_4$  intermediate photosynthesis when submerged but induce  $C_3/C_4$  or  $C_4$  photosynthesis by developing  $C_4$ -compatible leaf anatomy and expressing  $C_4$  enzymes in the emergent leaves ([Ueno \*et al.\*, 1988a](#); [Ueno, 2001](#); [Murphy \*et al.\*, 2007](#)). Finally, some amphibious  $C_4$  grasses seem to switch from a  $C_4$  system that functions without  $C_4$ -associated leaf anatomy in aquatic leaves to a classical dual-cell  $C_4$  cycle in aerial leaves ([Keeley, 1998](#); [Boykin \*et al.\*, 2008](#)).

Phenotypic plasticity for  $C_4$ -associated traits might have important implications for the evolution of  $C_4$  photosynthesis ([Sultan, 1987](#); [West-Eberhard \*et al.\*, 2011](#)). First, the direction and degree of phenotypic change in response to an environmental gradient is heritable ([Schlichting and Levin, 1986](#); [Schlichting and Pigliucci, 1993](#)), and the reaction norm for a trait is genetically distinct from the trait itself. Selection can therefore act independently on both a trait and on the plasticity for that trait. Plasticity may thus deter the evolutionary transition from  $C_3$  to  $C_4$  photosynthesis by diluting the effects of natural selection. However, adaptive phenotypic plasticity may promote  $C_4$  evolution if the plastic expression of  $C_4$ -suitable anatomical traits in  $C_3$  plants allows the colonization of new niches, leading to selective pressures for the gradual acquisition of  $C_4$  biochemistry ([Heckmann \*et al.\*, 2013](#)). Indeed, [Sage and McKown \(2006\)](#) reviewed the literature to find that  $C_3$  plants seem to be inherently more plastic than  $C_4$  plants overall. Thus, this capacity for phenotypic plasticity might affect the probability of evolving  $C_4$  photosynthesis. For instance, differential capacity in the phenotypic plasticity for important  $C_4$  anatomical traits among plant lineages may explain the differential propensity for  $C_4$  evolution. However, the plasticity of anatomical traits associated with  $C_4$  photosynthesis remains mostly unknown in  $C_3$  species, and more comparative work is required.

## Consequences for the evolution of $C_4$ -associated anatomy

When comparing the anatomy of a randomly selected  $C_3$  taxon with that of a highly efficient  $C_4$  species, the

evolutionary transition from  $C_3$  to  $C_4$  anatomy can seem extraordinary ([Fig. 1A, C](#)). However, it is important to note that  $C_4$  photosynthesis did not emerge from the average  $C_3$  taxon but from  $C_3$  ancestors with leaf anatomical properties much closer to the  $C_4$  requirements ([Figs 1B and 5](#)) ([Muhaidat \*et al.\*, 2011](#); [Christin \*et al.\*, 2013](#); [Sage \*et al.\*, 2013](#)). In the Poaceae, some species apparently using the  $C_3$  photosynthetic type have gross leaf anatomies that closely resemble those of  $C_4$  plants. For instance, *Panicum malacotrichum* and *Panicum pygmaeum* ([Fig. 2](#)) are two  $C_3$  grasses ( $\delta^{13}\text{C}$  values of  $-27.4$  and  $-29.7$ , respectively), which are closely related to several  $C_4$  lineages (namely *Alloteropsis* and *Echinochloa*; [Grass Phylogeny Working Group II, 2012](#)). These species possess large proportions of bundle-sheath tissue that are firmly in the  $C_4$  range [BS/(BS+M) of 0.26 and 0.23, respectively; [Christin \*et al.\*, 2013](#)], and most mesophyll cells are directly adjacent to the bundle sheath or separated by only one mesophyll cell ([Fig. 2](#)). Chloroplasts are still almost completely restricted to the mesophyll in these species. However, because the gross leaf anatomy is in place, fewer anatomical changes are necessary for the evolution of  $C_2$  or  $C_4$  photosynthesis. In other cases, such as the grass tribe Neurachninae,  $C_3$  species that are closely related to  $C_4$  species have both  $C_4$ -like gross anatomy [BS/(BS+M) of 0.14–0.16; [Christin \*et al.\*, 2013](#)] and the presence of conspicuous chloroplasts in the inner sheath, which was co-opted for  $C_4$  photosynthesis in this group ([Hattersley \*et al.\*, 1982](#)). These examples show that the evolution of  $C_4$ -suitable anatomy might not always require drastic modifications, as  $C_3$  lineages may possess  $C_4$ -like values for individual traits that can generate  $C_4$  leaf functions.

Each component of  $C_4$ -compatible leaf anatomy may vary independently within  $C_3$  ancestors, such that any combination of mesophyll cell size, bundle-sheath cell size, leaf thickness and interveinal distance could theoretically occur. However, the observed range is obviously more limited ([Fig. 4](#)), for a number of reasons. First, multiple traits might be influenced by the same gene (pleiotropy). For instance, genome size theoretically affects the size of all cells ([Grime and Mowforth, 1982](#); [Masterson, 1994](#); [Beaulieu \*et al.\*, 2008](#); [Šimová and](#)

**Table 1.** Degrees of co-variation among anatomical variables

Co-variation in grasses between the mean distance between consecutive bundle sheaths ( $\mu\text{m}$ ), outer bundle-sheath (OBS) cell width ( $\mu\text{m}$ ), inner bundle-sheath (IBS) cell width ( $\mu\text{m}$ ), number of mesophyll (M) cells between consecutive bundles, and leaf thickness ( $\mu\text{m}$ ).  $R^2$  values are provided for pairs of variables with significant correlations. Regressions with P values less than 0.05 are considered significant, while those with P values greater than 0.05 are indicated by NS. Phylogenetically controlled analyses were performed with the pglS function of the caper R package ([Orme \*et al.\*, 2012](#)), using the data for 155 grass species from [Christin \*et al.\* \(2013\)](#).

|             |                |                |             |                |
|-------------|----------------|----------------|-------------|----------------|
| BS distance |                |                |             |                |
| 0.02        | OBS cell width |                |             |                |
| NS          | 0.23           | IBS cell width |             |                |
| 0.58        | NS             | 0.05           | No. M cells |                |
| NS          | 0.28           | 0.43           | 0.12        | Leaf thickness |



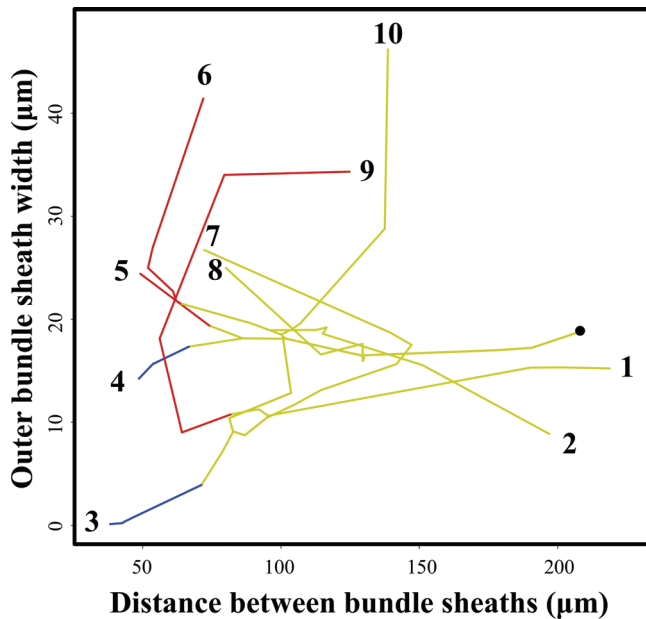

**Fig. 6.** Evolutionary trajectories toward  $C_4$ -compatible anatomical traits. Phylogenetic relationships are plotted in anatomical space for grass species selected to represent a diversity of anatomical traits. Values are the distance between consecutive bundle sheaths, and the width of outer bundle-sheath cells, which are observed for the tips and inferred for the internal nodes. The black point represents the root of the tree (see Christin *et al.*, 2013, for details). Yellow branches indicate a  $C_3$  state, red branches a  $C_4$  state using the outer sheath for the Calvin cycle, and blue branches a  $C_4$  state using the inner sheath for the Calvin cycle. Numbers refer to the extant species: 1, *Dichanthelium acuminatum* ( $C_3$ ); 2, *Danthonia spicata* ( $C_3$ ); 3, *Heteropogon contortus* ( $C_4$ ); 4, *Aristida congesta* ( $C_4$ ); 5, *Stipagrostis obtusa* ( $C_4$ ); 6, *Eleusine indica* ( $C_4$ ); 7, *Panicum malacotrichum* ( $C_3$ ); 8, *Oryza coarctata* ( $C_3$ ); 9, *Panicum miliaceum* ( $C_4$ ), 10, *Arundo donax* ( $C_3$ ). Data from Christin *et al.* (2013).

Herben, 2012), so that an increase in bundle-sheath cell size might co-occur with increases in the sizes of mesophyll cells. Plants often escape this constraint via cell-specific endoreduplication, which allows an increase of one type of cell relative to others (Sugimoto-Shirasu and Roberts, 2003), and comparative analyses show that variation in the cell sizes of different components of  $C_4$  anatomy is only partially correlated (Table 1). However, endoreduplication is not involved in the increase of bundle-sheath cell size, at least in the  $C_4$  *Cleome gynandra* (Aubry *et al.*, 2013). It is also likely that some combinations of traits are not viable, as the whole-leaf structure influences plant fitness (Noblin *et al.*, 2008), not its individual components.

The multidimensionality of leaf characteristics associated with  $C_4$  photosynthesis, as highlighted for the grass family, means that different combinations of underlying traits will generate  $C_4$ -compatible leaf anatomies (Fig. 4). For instance, both a proliferation of veins with small bundle-sheath cells and an increase of bundle-sheath cell size without additional veins would increase the relative amount of bundle-sheath cells (Fig. 6). This potential for alternative anatomical combinations to achieve the same functional outcome means that  $C_3$  ancestors will repeatedly reach  $C_4$ -compatible areas of the multidimensional trait space (Fig. 6), and increases the likelihood of  $C_4$  anatomy evolving (Williams *et al.*, 2013).

A sample of evolutionary trajectories in the Poaceae shows lineages for which repeated and independent alterations of the distance between bundle sheaths and bundle-sheath size led into different  $C_4$ -compatible regions of the anatomical space (Fig. 6). Obviously, not all  $C_3$  lineages that acquired  $C_4$ -suitable leaf anatomical characteristics have evolved  $C_4$  biochemistry. For example, *Panicum malacotrichum* and *Oryza coarctata* have  $C_4$ -suitable mesophyll distances between consecutive bundle sheaths and proportions of bundle-sheath tissue but have not developed the  $C_4$  syndrome (Figs 2 and 6) (Christin *et al.*, 2013). Furthermore, *Cleome violacea*, *C. africana*, and *C. paradoxa* have small interveinal distances, and *C. africana* and *C. paradoxa* also display enlarged bundle-sheath cells similar to their  $C_4$  congener *C. gynandra*, yet these three species do not employ the  $C_4$  photosynthetic system (Marshall *et al.*, 2007). However, the presence of these characteristics probably enables  $C_4$  evolution (pre-adaptation or exaptation *sensu* Gould and Vrba, 1982; Christin *et al.*, 2013; Griffiths *et al.*, 2013; Sage *et al.*, 2013). Once a  $C_4$ -compatible anatomy is in place, the  $C_4$  biochemical pathway can evolve from a  $C_3$  background in a stepwise sequence, where each step incrementally increases the efficiency of photosynthesis (Heckmann *et al.*, 2013). However, the multiple anatomical requirements for  $C_4$  photosynthesis do not usually co-occur in  $C_3$  plants. Interesting exceptions include plants with a  $C_2$  physiology, which were probably co-opted for the evolution of  $C_4$  photosynthesis (Christin *et al.*, 2011; Muhaidat *et al.*, 2011; Sage *et al.*, 2012).

### Functional $C_4$ diversity as a consequence of evolutionary diversity

Because  $C_4$ -compatible leaf anatomy engages multiple components, each  $C_4$  origin may involve different modifications and co-opt different compartments for the Calvin cycle (Brown, 1975; Dengler *et al.*, 1994; Edwards and Voznesenskaya, 2011; Christin *et al.*, 2013). The anatomy present in the  $C_3$  ancestor might affect which  $C_4$  phenotypes are possible. For instance,  $C_3$  ancestors with enhanced water storage tissue are likely to give rise to  $C_4$  leaves that maintain the same capacity to store water, with the PEPC and Calvin cycle compartments occupying other parts of the leaves (Voznesenskaya *et al.*, 1999; Kadereit *et al.*, 2003; Freitag and Kadereit, 2014). Similarly,  $C_4$  species that use the inner bundle sheath for the Calvin cycle must evolve from  $C_3$  ancestors that possessed two differentiated sheaths, as is the case with grasses and sedges (Dengler *et al.*, 1994; Soros and Dengler, 2001). Furthermore,  $C_4$  phenotypes that are functionally similar can be achieved through different modifications, even when starting with similar  $C_3$  ancestors.

Different modifications to fulfil the same  $C_4$  requirements might have functional consequences. Indeed, the adaptation of  $C_4$  photosynthesis through the evolution of thick leaves with large bundle-sheath cells (Fig. 3F) is likely to have different consequences from the evolution of thin leaves with small cells but very short interveinal distance (Fig. 3C). An increase in vein density will affect not only the hydraulics but

also the distribution of stomata, which tend to be located in between veins (Taylor *et al.*, 2012). Leaf thickness will have consequences for light-capture efficiency as well as ecologically meaningful traits such as specific leaf area (Wilson *et al.*, 2002). Similarly, light capture will also be affected by the different distribution of chloroplasts in mesophyll and bundle-sheath cells, and the relative abundance of each cell type, together with the orientation of mesophyll cells (Vogelmann *et al.*, 1996). The path length from stomata to the photosynthetically active cells will also be influenced by leaf thickness, interveinal distance, and amount of intercellular airspace (Noblin *et al.*, 2008). Finally, co-opting some areas of the leaf for C<sub>4</sub> photosynthesis while maintaining water storage cells will probably allow the C<sub>4</sub> descendants to thrive in more arid conditions (Voznesenskaya *et al.*, 1999; Kadereit *et al.*, 2012). All of these characteristics, which can be directly affected by the evolutionary path a species took to achieve C<sub>4</sub> function, will determine the physiology of a plant and thus its ecological preferences. Therefore, the diversity of evolutionary trajectories toward C<sub>4</sub>-compatible leaf anatomy might partially explain the ecological diversity associated with distinct C<sub>4</sub> lineages (e.g. Taub, 2000; Kadereit *et al.*, 2012; Liu *et al.*, 2012).

### Consequences for putative genetic determinism

A detailed discussion of genetic determinants is beyond the scope of this paper. However, it is worth pointing out that, despite recent important developments (e.g. Slewinski *et al.*, 2013; Wang *et al.*, 2013; Lundquist *et al.*, 2014), the genetic mechanisms necessary to introduce C<sub>4</sub>-compatible anatomy into C<sub>3</sub> species remain largely unknown. This has particular implications for the bioengineering of C<sub>4</sub> photosynthesis into major C<sub>3</sub> crops, such as rice and wheat, which has the potential to greatly enhance yield (Covshoff and Hibberd, 2012; von Caemmerer *et al.*, 2012). First, the multiplicity of traits means that there are probably multiple genes involved. For instance, a phylogenetic analysis shows that the distance between consecutive bundle sheaths and the size of these bundle sheaths vary independently in grasses (Table 1), suggesting different underlying genetic changes. Second, as the variation in most traits presents a continuum from C<sub>3</sub> to C<sub>4</sub> plants, the determinism is likely to involve multiple genes with small effects and no master switch. Third, the diversity of strategies used to achieve leaf functions that are compatible with C<sub>4</sub> photosynthesis means that genetic determinism is likely to differ among C<sub>4</sub> lineages. Finally, the genetic changes that occur during the evolution of C<sub>4</sub> photosynthesis are likely to vary as a function of the condition in the C<sub>3</sub> ancestor.

Interestingly, similar variation in some of the underlying traits exists in C<sub>3</sub> and C<sub>4</sub> species, which suggests that useful genetic variants may be identified from the analysis of C<sub>3</sub> taxa that vary in only some of the traits, even if these C<sub>3</sub> taxa do not present C<sub>4</sub>-like anatomies. For instance, a C<sub>3</sub> taxon with variation in the number of mesophyll cells between consecutive veins would be a good study system, even if the bundle sheath and distribution of chloroplasts were not

C<sub>4</sub>-compatible. Considering variation within C<sub>3</sub> taxa that are unrelated to C<sub>4</sub> lineages might therefore expose new ways to identify the adaptive significance of individual C<sub>4</sub> components, as well as their genetic determinism.

### Conclusions

Overall, C<sub>4</sub> leaves can be defined by a set of important functions that characterize all C<sub>4</sub> plants. However, the underlying developmental characteristics that generate these functional properties are extremely variable, as a consequence of the taxonomic diversity of C<sub>4</sub> plants. The same functionally important traits are not homologous among all C<sub>4</sub> plants, and this has important implications for the evolution and underlying genetics of C<sub>4</sub>-specific leaf anatomy. In addition, the developmental modifications that generate each of the essential requirements of C<sub>4</sub> leaf anatomy can happen independently. Thus, distantly related C<sub>4</sub> groups might arrive at the same phenotype for one of these requirements (e.g. both groups co-opt the same compartment for the Calvin cycle) but not another (e.g. they achieve small distances between the two compartments through either a reduction in the number of cells between veins or the development of additional veins).

Most of the anatomical characteristics that can generate functional properties of C<sub>4</sub> leaves exist in at least some C<sub>3</sub> plants. The only well-characterized exception is chloroplast concentration in the compartment co-opted for the segregation of the Calvin cycle, which seems to be specific to C<sub>4</sub> plants, and to some extent C<sub>2</sub> plants. Without considering the distribution of chloroplasts and hence C<sub>4</sub> physiology, leaves of C<sub>3</sub> and C<sub>4</sub> plants cannot be placed into mutually exclusive categories (see Fig. 3, for example), and there is continuous variation of the underlying traits among C<sub>4</sub> and C<sub>3</sub> species (Fig. 4). Hard categorization is meaningful from a functional perspective, but it wrongly suggests that the recurrent emergence of C<sub>4</sub> photosynthesis represents the same number of drastic transitions between two distinct and homogeneous characteristic states. Acknowledging the diversity present within both C<sub>3</sub> and C<sub>4</sub> taxa, and the continuum that exists between these two physiological states, is paramount to understanding the evolutionary processes that led to C<sub>4</sub> plants, as well as the genetic mechanisms responsible for C<sub>4</sub>-compatible leaf anatomy.

### Supplementary data

Supplementary data are available at *JXB* online.

**Supplementary Fig. S1.** Cross-sections corresponding to the diagrams shown in Fig. 3.

### Acknowledgements

This work was funded by a University of Sheffield Prize Scholarship to MRL, and a Royal Society University Research Fellowship UF120119 to PAC. The authors thank Dr David Chatelet from Brown University and Professor Travis Columbus from Rancho Santa Ana Botanic Garden who provided the leaf cross-sections reproduced in the figures.

## References

- Araus JL, Brown HR, Byrd GT, Serret MD.** 1991. Comparative effects of growth irradiance on photosynthesis and leaf anatomy of *Flaveria brownii* (C<sub>4</sub>-like), *Flaveria linearis* (C<sub>3</sub>-C<sub>4</sub>) and their F1 hybrid. *Planta* **183**, 497–504.
- Araus JL, Brown RH, Bouton JH, Serret MD.** 1990. Leaf anatomical characteristics in *Flaveria trinervia* (C<sub>4</sub>), *Flaveria brownii* (C<sub>4</sub>-like) and their F1 hybrid. *Photosynthesis Research* **26**, 49–57.
- Aubry S, Kneřová J, Hibberd JM.** 2013. Endoreduplication is not involved in bundle-sheath formation in the C<sub>4</sub> species *Cleome gynandra*. *Journal of Experimental Botany* **65**, 3557–3566.
- Beaulieu JM, Leitch IJ, Patel S, Pendharker A, Knight CA.** 2008. Genome size is a strong predictor of cell size and stomatal density in angiosperms. *New Phytologist* **179**, 975–986.
- Berry JA, Downton WJS, Tregunna EB.** 1970. The photosynthetic carbon metabolism of *Zea mays* and *Gomphrena globosa*: the location of the CO<sub>2</sub> fixation and the carboxyl transfer reactions. *Canadian Journal of Botany* **48**, 777–786.
- Besnard G, Christin PA, Male PJ, Coissac E, Ralimanana, Vorontsova MS.** 2013. Phylogenomics and taxonomy of Lecomtelleae (Poaceae), an isolated panicoid lineage from Madagascar. *Annals of Botany* **112**, 1057–1066.
- Boardman NK.** 1977. Comparative photosynthesis of sun and shade plants. *Annual Review of Plant Physiology* **28**, 355–377.
- Bolton JK, Brown RH.** 1980. Photosynthesis of grass species differing in carbon dioxide fixation pathways V. Response of *Panicum maximum*, *Panicum milioides*, and tall fescue (*Festuca arundinacea*) to nitrogen nutrition. *Plant Physiology* **66**, 97–100.
- Botha CEJ.** 1992. Plasmodesmatal distribution, structure and frequency in relation to assimilation in C<sub>3</sub> and C<sub>4</sub> grasses in southern Africa. *Planta* **187**, 348–358.
- Bowes G, Haladay AS, Haller WT.** 1979. Seasonal variation in the biomass, tuber density, and photosynthetic metabolisms of *Hydrilla* in three Florida lakes. *Journal of Aquatic Plant Management* **17**, 61–65.
- Bowes G, Rao SK, Estavillo GM, Reiskind JB.** 2002. C<sub>4</sub> mechanisms in aquatic angiosperms: comparisons with terrestrial C<sub>4</sub> systems. *Functional Plant Biology* **29**, 379–392.
- Bowes G, Salvucci ME.** 1984. *Hydrilla*: inducible C<sub>4</sub>-type photosynthesis without Kranz anatomy. *Advances in Photosynthesis Research* **3**, 829–832.
- Bowes G, Salvucci ME.** 1989. Plasticity in the photosynthetic carbon metabolism of submersed aquatic macrophytes. *Aquatic Botany* **34**, 233–266.
- Bowes G.** 2011. Single-cell C<sub>4</sub> photosynthesis in aquatic plants. In: Raghavendra AS, Sage RF, eds. *C<sub>4</sub> photosynthesis and related CO<sub>2</sub> concentrating mechanisms*. The Netherlands: Springer, 63–80.
- Bowman SM, Patel M, Yerramsetty P, Mure CM, Zielinski AM, Bruenn JA, Berry JO.** 2013. A novel RNA binding protein affects *rbcl* gene expression and is specific to bundle sheath chloroplasts in C<sub>4</sub> plants. *BMC Plant Biology* **13**, 138.
- Boykin LM, Pockman WT, Lowrey TK.** 2008. Leaf anatomy of Orcuttieae (Poaceae: Chloridoideae): more evidence of C<sub>4</sub> photosynthesis without Kranz anatomy. *Madroño* **55**, 143–150.
- Brown WV.** 1975. Variations in anatomy, associations, and origins of Kranz tissue. *American Journal of Botany* **62**, 395–402.
- Brown WV.** 1977. The Kranz syndrome and its subtypes in grass systematics. *Memoirs of the Torrey Botanical Club* **23**, 1–97.
- Brown WV, Smith BN.** 1972. Grass evolution, the Kranz syndrome, <sup>13</sup>C/<sup>12</sup>C ratios, and continental drift. *Nature* **239**, 345–346.
- Bruhl JJ, Perry S.** 1995. Photosynthetic pathway-related ultrastructure of C<sub>3</sub>, C<sub>4</sub>, and C<sub>3</sub>-like C<sub>3</sub>-C<sub>4</sub> intermediate sedges (Cyperaceae), with special reference to *Eleocharis*. *Australian Journal of Plant Physiology* **22**, 521–530.
- Carolin RC, Jacobs SWL, Vesk M.** 1973. The structure of the cells of the mesophyll and parenchymatous bundle sheath of the Gramineae. *Botanical Journal of the Linnean Society* **66**, 259–275.
- Carolin RC, Jacobs SWL, Vesk M.** 1975. Leaf structure in Chenopodiaceae. *Botanische Jahrbücher für Systematik, Pflanzengeschichte und Pflanzengeographie* **95**, 226–255.
- Carolin RC, Jacobs SWL, Vesk M.** 1977. The ultrastructure of Kranz cells in the family Cyperaceae. *Botanical Gazette* **138**, 413–419.
- Christin PA, Freckleton RP, Osborne CP.** 2010. Can phylogenetics identify C<sub>4</sub> origins and reversals? *Trends in Ecology and Evolution* **25**, 403–409.
- Christin PA, Osborne CP.** 2013. The recurrent assembly of C<sub>4</sub> photosynthesis, an evolutionary tale. *Photosynthesis Research* **117**, 163–175.
- Christin PA, Osborne CP, Chatelet DS, Columbus JT, Besnard G, Hodkinson TR, Garrison LM, Vorontsova MS, Edwards EJ.** 2013. Anatomical enablers and the evolution of C<sub>4</sub> photosynthesis in grasses. *Proceedings of the National Academy of Sciences, USA* **110**, 1381–1386.
- Christin PA, Sage TL, Edwards EJ, Ogburn RM, Khoshravesh R, Sage RF.** 2011. Complex evolutionary transitions and the significance of C<sub>3</sub>-C<sub>4</sub> intermediate forms of photosynthesis in Molluginaceae. *Evolution* **65**, 643–660.
- Covshoff S, Hibberd JM.** 2012. Integrating C<sub>4</sub> photosynthesis into C<sub>3</sub> crops to increase yield potential. *Current Opinion in Biotechnology* **23**, 209–214.
- Crookston RK, Moss DN.** 1970. The relation of carbon dioxide compensation and chlorenchymatous vascular bundle sheaths in leaves of dicots. *Plant Physiology* **46**, 564–567.
- Das VSR, Raghavendra AS.** 1976. C<sub>4</sub> photosynthesis and a unique type of Kranz anatomy in *Glossocordia boswallaea* (Asteraceae). *Proceedings of the Indian Academy of Sciences* **84B**, 12–19.
- Dengler NG, Dengler RE, Donnelly PM, Hattersley PW.** 1994. Quantitative leaf anatomy of C<sub>3</sub> and C<sub>4</sub> grasses (Poaceae): bundle sheath and mesophyll surface area relationships. *Annals of Botany* **73**, 241–255.
- Dengler NG, Dengler RE, Hattersley PW.** 1985. Differing ontogenetic origins of PCR (“Kranz”) sheaths in leaf blades of C<sub>4</sub> grasses (Poaceae). *American Journal of Botany* **72**, 284–302.
- Dengler NG, Donnelly PM, Dengler RE.** 1996. Differentiation of bundle sheath, mesophyll, and distinctive cells in the C<sub>4</sub> grass *Arundinella hirta* (Poaceae). *American Journal of Botany* **83**, 1391–1405.
- Downton WJS, Tregunna EB.** 1968. Carbon dioxide compensation-its relation to photosynthetic carboxylation reactions, systematics of the Gramineae, and leaf anatomy. *Canadian Journal of Botany* **46**, 207–215.
- Duval-Jouve J.** 1875. Histotaxie des feuilles des Graminees. *Annales des Sciences Naturelles Botanical Series* **61**, 227–346.
- Edwards GE, Franceschi VR, Voznesenskaya EV.** 2004. Single-cell C<sub>4</sub> photosynthesis versus the dual-cell (Kranz) paradigm. *Annual Review of Plant Biology* **55**, 173–196.
- Edwards GE, Ku MSB.** 1987. Biochemistry of C<sub>3</sub>-C<sub>4</sub> intermediates. In: Hatch MD, Boardman NK, eds. *The biochemistry of plants: a comprehensive treatise*, Vol. 10. New York: Academic Press, 275–325.
- Edwards GE, Voznesenskaya EV.** 2011. C<sub>4</sub> photosynthesis: Kranz forms and single-cell C<sub>4</sub> in terrestrial plants. In: Raghavendra AS, Sage RF, eds. *C<sub>4</sub> photosynthesis and related CO<sub>2</sub> concentrating mechanisms*. The Netherlands: Springer, 29–61.
- El-Sharkawy M, Hesketh J.** 1965. Photosynthesis among species in relation to characteristics of leaf anatomy and CO<sub>2</sub> diffusion resistances. *Crop Science* **5**, 517–521.
- Freitag H, Kadereit G.** 2014. C<sub>3</sub> and C<sub>4</sub> leaf anatomy types in Camphorosmeae (Camphorosmoideae, Chenopodiaceae). *Plant Systematics and Evolution* **300**, 665–687.
- Freitag H, Stichler W.** 2000. A remarkable new leaf type with unusual photosynthetic tissue in a central Asiatic genus of Chenopodiaceae. *Plant Biology* **2**, 154–160.
- Gong CM, Bai J, Deng JM, Wang GX, Liu XP.** 2011. Leaf anatomy and photosynthetic carbon metabolic characteristics in *Phragmites communis* in different soil water availability. *Plant Ecology* **211**, 675–687.
- Gould SJ, Vrba ES.** 1982. Exaptation—a missing term in the science of form. *Paleontological Society* **8**, 4–15.



- Grass Phylogeny Working Group II.** 2012. New grass phylogeny resolves deep evolutionary relationships and discovers  $C_4$  origins. *New Phytologist* **193**, 304–312.
- Griffiths H, Weller G, Toy LFM, Dennis RJ.** 2013. You're so vein: bundle sheath physiology, phylogeny and evolution in  $C_3$  and  $C_4$  plants. *Plant, Cell & Environment* **36**, 249–261.
- Grime JP, Mowforth MA.** 1982. Variation in genome size—an ecological interpretation. *Nature* **299**, 151–153.
- Haberlandt G.** 1884. *Physiologische Pflanzenanatomie*. Leipzig: Engelmann.
- Hatch MD.** 1987.  $C_4$  photosynthesis: a unique blend of modified biochemistry, anatomy and ultrastructure. *Biochimica et Biophysica Acta* **895**, 81–106.
- Hattersley PW, Browning AJ.** 1981. Occurrence of the suberized lamella in leaves of grasses of different photosynthetic types. I. In parenchymatous bundle sheaths and PCR (“Kranz”) sheaths. *Protoplasma* **109**, 371–401.
- Hattersley PW, Watson L, Johnston FLS, Johnson CR.** 1982. Remarkable leaf anatomical variations in *Neurachne* and its allies (Poaceae) in relation to  $C_3$  and  $C_4$  photosynthesis. *Botanical Journal of the Linnean Society* **84**, 265–272.
- Hattersley PW, Watson L, Osmond CB.** 1977. In situ immunofluorescent labelling of Ribulose-1,5-bisphosphate Carboxylase in leaves of  $C_3$  and  $C_4$  plants. *Australian Journal of Plant Physiology* **4**, 523–539.
- Hattersley PW, Watson L.** 1975. Anatomical parameters for predicting photosynthetic pathways of grass leaves: the ‘maximum lateral cell count’ and the ‘maximum cells distant count’. *Phytomorphology* **25**, 325–333.
- Hattersley PW, Watson L.** 1992. Diversification of photosynthesis. In: Chapman GP, ed. *Grass evolution and domestication*. Cambridge: Cambridge University Press, 38–116.
- Hattersley PW.** 1984. Characterization of  $C_4$  type leaf anatomy in grasses (Poaceae). Mesophyll: bundle sheath area ratios. *Annals of Botany* **53**, 163–179.
- Heckmann D, Schulze S, Denton A, Gowik U, Westhoff P, Weber AP, Lercher MJ.** 2013. Predicting  $C_4$  photosynthesis evolution: modular, individually adaptive steps on a Mount Fuji fitness landscape. *Cell* **153**, 1579–1588.
- Hibberd JM.** 2007. *Cleome*, a genus closely related to Arabidopsis, contains species spanning a developmental progression from  $C_3$  to  $C_4$  photosynthesis. *The Plant Journal* **51**, 886–896.
- Hylton CM, Rawsthorne S, Smith AM, Jones DA, Woolhouse HW.** 1988. Glycine decarboxylase is confined to the bundle-sheath cells of leaves of  $C_3$ - $C_4$  intermediate species. *Planta* **175**, 452–459.
- Kadereit G, Ackerly D, Pirie MD.** 2012. A broader model for  $C_4$  photosynthesis evolution in plants inferred from the goosefoot family (Chenopodiaceae s.s.). *Proceedings of the Royal Society B: Biological Sciences* **279**, 3304–3311.
- Kadereit G, Borsch T, Weising K.** 2003. Phylogeny of Amaranthaceae and Chenopodiaceae and the evolution of  $C_4$  photosynthesis. *International Journal of Plant Sciences* **164**, 959–986.
- Keeley JE.** 1998.  $C_4$  photosynthetic modifications in the evolutionary transition from land to water in aquatic grasses. *Oecologia* **116**, 85–97.
- Kellogg EA.** 1999. Phylogenetic aspects of the evolution of  $C_4$  photosynthesis. In: Sage RF, Monson RK, eds.  *$C_4$  plant biology*. San Diego: Academic Press, 411–444.
- Koteyeva NK, Voznesenskaya EV, Roalson EH, Edwards GE.** 2011. Diversity in forms of  $C_4$  in the genus *Cleome* (Cleomaceae). *Annals of Botany* **107**, 269–283.
- Laetsch WM.** 1974. The  $C_4$  syndrome: a structural analysis. *Annual Review of Plant Physiology* **25**, 27–52.
- Leegood RC.** 2002.  $C_4$  photosynthesis: principles of  $CO_2$  concentration and prospects for its introductions into  $C_3$  plants. *Journal of Experimental Botany* **53**, 581–590.
- Leegood RC.** 2008. Roles of the bundle sheath cells in leaves of  $C_3$  plants. *Journal of Experimental Botany* **59**, 1663–1673.
- Liu H, Edwards EJ, Freckleton RP, Osborne CP.** 2012. Phylogenetic niche conservatism in  $C_4$  grasses. *Oecologia* **170**, 835–845.
- Ludwig LJ, Canvin DT.** 1971. The rate of photorespiration during photosynthesis and the relationship of the substrate of light respiration to the products in sunflower leaves. *Plant Physiology* **48**, 712–719.
- Lundquist PK, Rosar C, Brautigam A, Weber APM.** 2014. Plastid signals and the bundle sheath:mesophyll development in reticulate mutants. *Molecular Plant* **7**, 14–29.
- Marshall DM, Muhaidat R, Brown NJ, Liu Z, Stanley S, Griffiths H, Sage RF, Hibberd JM.** 2007. *Cleome*, a genus closely related to Arabidopsis, contains species spanning a developmental progression from  $C_3$  to  $C_4$  photosynthesis. *The Plant Journal* **51**, 886–896.
- Martins S, Scatena VL.** 2011. Bundle sheath ontogeny in Kranz and non-Kranz species of Cyperaceae (Poales). *Australian Journal of Botany* **59**, 554–562.
- Masterson J.** 1994. Stomatal size in fossil plants: evidence for polyploidy in majority of angiosperms. *Science* **264**, 421–424.
- McKown AD, Cochard H, Sack L.** 2010. Decoding leaf hydraulics with a spatially explicit model: Principles of venation architecture and implications for its evolution. *American Naturalist* **175**, 447–460.
- McKown AD, Dengler NG.** 2007. Key innovations in the evolution of Kranz anatomy and  $C_4$  vein pattern in *Flaveria* (Asteraceae). *American Journal of Botany* **94**, 382–399.
- McKown AD, Dengler NG.** 2009. Shifts in leaf vein density through accelerated vein formation in  $C_4$  *Flaveria* (Asteraceae). *Annals of Botany* **104**, 1085–1098.
- Muhaidat R, Sage RF, Dengler NG.** 2007. Diversity of Kranz anatomy and biochemistry in  $C_4$  eudicots. *American Journal of Botany* **94**, 362–381.
- Muhaidat R, Sage TL, Frohlich MW, Dengler NG, Sage RF.** 2011. Characterization of  $C_3$ - $C_4$  intermediate species in the genus *Heliotropium* L. (Boraginaceae): anatomy, ultrastructure and enzyme activity. *Plant, Cell & Environment* **10**, 1723–1736.
- Murphy LR, Barroca J, Franceschi VR, Lee R, Roalson EH, Edwards GE, Ku MSB.** 2007. Diversity and plasticity of  $C_4$  photosynthesis in *Eleocharis* (Cyperaceae). *Functional Plant Biology* **34**, 571–580.
- Nelson T.** 2011. Development of leaves in  $C_4$  plants: anatomical features that support  $C_4$  metabolism. In: Raghavendra AS, Sage RF, eds.  *$C_4$  photosynthesis and related  $CO_2$  concentrating mechanisms*. The Netherlands: Springer, 147–159.
- Noblin X, Mahadevan L, Coomaraswamy IA, Weitz DA, Holbrook NM, Zwieniecki MA.** 2008. Optimal vein density in artificial and real leaves. *Proceedings of the National Academy of Sciences, USA* **105**, 9140–9144.
- Ocampo G, Koteyeva NK, Voznesenskaya EV, Edwards GE, Sage TL, Sage RF, Columbus JT.** 2013. Evolution of leaf anatomy and photosynthetic pathways in Portulacaceae. *American Journal of Botany* **100**, 2388–2402.
- Ogle K.** 2003. Implications of interveinal distance for quantum yield in  $C_4$  grasses: a modeling and meta-analysis. *Oecologia*, **4**, 532–542.
- Olesen P.** 1975. Plasmodesmata between mesophyll and bundle sheath cells in relation to the exchange of  $C_4$ -acids. *Planta* **123**, 199–202.
- Orme D, Freckleton R, Thomas G, Petzoldt T, Fritz S, Isaac N, Pearse W.** 2012. Caper: Comparative analyses of phylogenetics and evolution in R Package version 0.5. Available at <http://cran.r-project.org/web/packages/caper/index.html>.
- Peter G, Katinas L.** 2003. A new type of Kranz anatomy in Asteraceae. *Australian Journal of Botany* **51**, 217–226.
- Renvoize SA.** 1983. A survey of leaf-blade anatomy in grasses IV. Eragrostideae. *Kew Bulletin* **38**, 469–478.
- Renvoize SA.** 1985. A survey of leaf-blade anatomy in grasses V. The bamboo allies. *Kew Bulletin* **40**, 509–535.
- Renvoize SA.** 1987a. A survey of leaf-blade anatomy in grasses XI. Paniceae. *Kew Bulletin* **42**, 739–768.
- Renvoize SA.** 1987b. A survey of leaf-blade anatomy in grasses X: Bambuseae. *Kew Bulletin* **42**, 201–207.
- Sack L, Scoffoni C, John GP, Poorter H, Mason CM, Mendez-Alonzo R, Donovan LA.** 2013. How do leaf veins influence the worldwide leaf economic spectrum? Review and synthesis. *Journal of Experimental Botany* **64**, 4053–4080.
- Sack L, Scoffoni C, McKown AD, Frole K, Rawls M, Harvan JC, Tran H, Tran T.** 2012. Developmentally based scaling of leaf venation

- architecture explains global ecological patterns. *Nature Communications* **3**, 837.
- Sack L, Scoffoni C.** 2013. Leaf venation: structure, function, development, evolution, ecology and applications in the past, present and future. *New Phytologist* **198**, 983–1000.
- Sage RF.** 2001. Environmental and evolutionary preconditions for the origin and diversification of the C<sub>4</sub> photosynthetic syndrome. *Plant Biology* **3**, 202–213.
- Sage RF, Christin PA, Edwards EJ.** 2011. The C<sub>4</sub> plant lineages of planet Earth. *Journal of Experimental Botany* **62**, 3155–3169.
- Sage RF, McKown AD.** 2006. Is C<sub>4</sub> photosynthesis less phenotypically plastic than C<sub>4</sub> photosynthesis? *Journal of Experimental Botany* **57**, 303–317.
- Sage RF, Sage TL, Kocacinar F.** 2012. Photorespiration and the evolution of C<sub>4</sub> photosynthesis. *Annual Review of Plant Biology* **63**, 19–47.
- Sage TL, Busch F, Johnson DC, Friesen PC, Stinson CR, Stata M, Sultmanis S, Rahman BA, Rawsthorne S, Sage RF.** 2013. Initial events during the evolution of C<sub>4</sub> photosynthesis in C<sub>3</sub> species of *Flaveria*. *Plant Physiology* **163**, 1266–1276.
- Schlichting CD, Levin DA.** 1986. Phenotypic plasticity: an evolving plant character. *Biological Journal of the Linnean Society* **29**, 37–47.
- Schlichting CD, Pigliucci M.** 1993. Evolution of phenotypic plasticity via regulatory genes. *American Naturalist* **142**, 366–370.
- Šímová I, Herben T.** 2012. Geometrical constraints in the scaling relationships between genome size, cell size and cell cycle length in herbaceous plants. *Proceedings of the Royal Society B: Biological Sciences* **279**, 867–875.
- Sinha NR, Kellogg EA.** 1996. Parallelism and diversity in multiple origins of C<sub>4</sub> photosynthesis in the grass family. *American Journal of Botany* **83**, 1458–1470.
- Skillman JB.** 2008. Quantum yield variation across the three pathways of photosynthesis: not yet out of the dark. *Journal of Experimental Botany* **59**, 1647–1661.
- Slewis TL, Anderson AA, Zhang C, Turgeon R.** 2013. Scarecrow plays a role in establishing Kranz anatomy in maize leaves. *Plant and Cell Physiology* **53**, 2030–2037.
- Soros CL, Dengler NG.** 2001. Ontogenetic derivation and cell differentiation in photosynthetic tissues of C<sub>3</sub> and C<sub>4</sub> Cyperaceae. *American Journal of Botany* **88**, 992–1005.
- Sugimoto-Shirasu K, Roberts K.** 2003. “Big it up”: endoreduplication and cell-size control in plants. *Current Opinion in Plant Biology* **6**, 544–553.
- Sultan SE.** 1987. Evolutionary implications of phenotypic plasticity in plants. *Evolutionary Biology* **21**, 127–178.
- Tateoka T.** 1958. Notes on some grasses. VIII. On leaf structure of *Arundinella* and *Garnotia*. *Botanical Gazette* **120**, 101–109.
- Taub DR.** 2000. Climate and the U.S. Distribution of C<sub>4</sub> grass subfamilies and decarboxylation variants of C<sub>4</sub> photosynthesis. *American Journal of Botany* **87**, 1211–1215.
- Taylor SH, Franks PJ, Hulme SP, Spriggs E, Christin PA, Edwards EJ, Woodward FI, Osborne CP.** 2012. Photosynthetic pathway and ecological adaptation explain stomatal trait diversity amongst grasses. *New Phytologist* **193**, 387–396.
- Terashima I, Miyazawa SI, Hanba YT.** 2001. Why are sun leaves thicker than shade leaves? Consideration based on analyses of CO<sub>2</sub> diffusion in the leaf. *Journal of Plant Research* **114**, 93–105.
- Ueno O, Kawano Y, Wakayama M, Takeda T.** 2006. Leaf vascular systems in C<sub>3</sub> and C<sub>4</sub> grasses: a two-dimensional analysis. *Annals of Botany* **97**, 611–621.
- Ueno O, Samejima M, Muto S, Miyachi S.** 1988a. Photosynthetic characteristics of an amphibious plant, *Eleocharis vivipara*: expression of C<sub>4</sub> and C<sub>3</sub> modes in contrasting environments. *Proceedings of the National Academy of Sciences, USA* **85**, 6733–6737.
- Ueno O, Takeda T, Maeda E.** 1988b. Leaf ultrastructure of C<sub>4</sub> species possessing different Kranz anatomical types in the Cyperaceae. *Botanical Magazine* **101**, 141–152.
- Ueno O.** 1995. Occurrence of distinctive cells in leaves of C<sub>4</sub> species in *Arthraxon* and *Microstegium* (Andropogoneae-Poaceae) and the structural and immunocytochemical characterization of these cells. *International Journal of Plant Sciences* **156**, 270–289.
- Ueno O.** 2001. Environmental regulation of C<sub>3</sub> and C<sub>4</sub> differentiation in the amphibious sedge *Eleocharis vivipara*. *Plant Physiology* **127**, 1524–1532.
- Ueno O, Sentoku N.** 2006. Comparison of leaf structure and photosynthetic characteristics of C<sub>3</sub> and C<sub>4</sub> *Alloternopsis semialata* subspecies. *Plant, Cell & Environment* **29**, 257–268.
- Vogelmann TC, Nishio JN, Smith WK.** 1996. Leaves and light capture: light propagation and gradients of carbon fixation within leaves. *Trends in Plant Science* **1**, 65–70.
- von Caemmerer S, Furbank RT.** 2003. The C<sub>4</sub> pathway: an efficient CO<sub>2</sub> pump. *Photosynthesis Research* **77**, 191–207.
- von Caemmerer S, Quick PW, Furbank RT.** 2012. The development of C<sub>4</sub> rice: current progress and future challenges. *Science* **336**, 1671–1672.
- Voznesenskaya EV, Franceschi VR, Chuong SDX, Edwards GE.** 2006. Functional characterization of phosphoenolpyruvate carboxylase-type C<sub>4</sub> leaf anatomy: immuno-, chytochemical and ultrastructural analysis. *Annals of Botany* **98**, 77–91.
- Voznesenskaya EV, Franceschi VR, Pyankov VI, Edwards GE.** 1999. Anatomy, chloroplast structure and compartmentation of enzymes relative to photosynthetic mechanisms in leaves and cotyledons of species in the tribe Salsoleae (Chenopodiaceae). *Journal of Experimental Botany* **50**, 1779–1795.
- Wakayama M, Ueno O, Ohnishi J.** 2003. Photosynthetic enzyme accumulation during leaf development of *Arundinella hirta*, a C<sub>4</sub> grass having Kranz cells not associated with veins. *Plant and Cell Physiology* **44**, 1330–1340.
- Wang P, Kelly S, Fouracre JP, Langdale JA.** 2013. Genome-wide transcript analysis of early maize leaf development reveals gene cohorts associated with the differentiation of C<sub>4</sub> Kranz anatomy. *The Plant Journal* **75**, 656–670.
- Weiner H, Bunnell JN, Woodrow IE, Heldt HW, Hatch MD.** 1988. Metabolite diffusion into bundle sheath cells from C<sub>4</sub> plants relation to C<sub>4</sub> photosynthesis and plasmodesmatal function. *Plant Physiology* **88**, 815–822.
- Welkie W, Caldwell M.** 1970. Leaf anatomy of species in some dicotyledon families as related to the C<sub>3</sub> and C<sub>4</sub> pathways of carbon fixation. *Canadian Journal of Botany* **48**, 2135–2146.
- West-Eberhard MJ, Smith JAC, Winter K.** 2011. Photosynthesis, reorganized. *Science* **332**, 311–312.
- Williams BP, Johnston IG, Covshoff S, Hibberd JM.** 2013. Phenotypic landscape inference reveals multiple evolutionary paths to C<sub>4</sub> photosynthesis. *eLife* **2**, e00961.
- Wilson PJ, Thompson K, Hodgson JG.** 2002. Specific leaf area and leaf dry matter content as alternative predictors of plant strategies. *New Phytologist* **143**, 155–162.
- Woo KC, Anderson JM, Boardman N, Downton WJS, Osmond C, Thorne SW.** 1970. Deficient photosystem II in agranal bundle sheath chloroplasts of C<sub>4</sub> plants. *Proceedings of the National Academy of Sciences, USA* **67**, 18–25.
